# Supplementary material for: Polynuclear Cu(i) and Ag(i) phosphine complexes containing multi-dentate polytopic ligands: syntheses, crystal structures and photoluminescence properties
Source: Royal Society of Chemistry journal article supplement (doi:10.1039/c8dt03377c), 2018-12-03

# Supporting information

## Polynuclear Cu(I) and Ag(I) Phosphine Complexes Containing multi-dentate polytopic ligands: Synthesis, Crystal Structures and Photoluminescence Properties

Jing Xiang,<sup>a,\*</sup> Shun-Cheung Cheng,<sup>b</sup> Xin-Xin Jin,<sup>a</sup> Qian-Qian Su,<sup>a</sup> Xin Zhou,<sup>a</sup> Wing-Kin Chu,<sup>b</sup> Chi-Fai Leung,<sup>c,\*</sup> and Chi-Chiu Ko<sup>b,\*</sup>

---

<sup>a</sup> College of Chemistry and Environmental Engineering, Yangtze University, Jingzhou 434020, Hubei, P. R. China. Email:

xiangjing@yangtzeu.edu.cn

<sup>b</sup> Department of Chemistry, Institute of Molecular Functional Materials, City University of Hong Kong, Tat Chee Avenue, Kowloon Tong, Hong Kong, China

<sup>c</sup> Department of Science and Environmental Studies, The Education University of Hong Kong, 10 Lo Ping Road, Tai Po, Hong Kong, China

## Table of supporting information

|            |                                                                                                                                                                                                                                                           |    |
|------------|-----------------------------------------------------------------------------------------------------------------------------------------------------------------------------------------------------------------------------------------------------------|----|
|            | Experimental section                                                                                                                                                                                                                                      | 3  |
| Figure S1  | $^1\text{H}$ NMR spectroscopy of <b>1</b>                                                                                                                                                                                                                 | 4  |
| Figure S2  | $^{31}\text{P}\{^1\text{H}\}$ NMR spectroscopy of <b>1</b> .                                                                                                                                                                                              | 4  |
| Figure S3  | The $\pi\cdots\pi$ stacking interactions in <b>1</b> (a), <b>2</b> (b), <b>3</b> (c) and <b>4</b> (d).                                                                                                                                                    | 5  |
| Figure S4  | UV spectra of ligands <b>L</b> <sup>1</sup> , <b>H</b> <sub>2</sub> <b>L</b> <sup>2</sup> and <b>H</b> <sub>3</sub> <b>L</b> <sup>3</sup> in MeCN.                                                                                                        | 5  |
| Figure S5  | The emission spectra of compounds <b>1</b> and <b>3</b> in $\text{CH}_2\text{Cl}_2$ ( $\lambda_{\text{ex}} = 400$ nm)                                                                                                                                     | 5  |
| Figure S6  | Emission spectra of <b>3</b> in the solid state (a) and in 77 K EtOH-MeOH (4:1, v/v) glassy state (b).                                                                                                                                                    | 6  |
| Figure S7  | Emission spectra of <b>6</b> in the solid state (a) and in 77 K EtOH-MeOH (4:1, v/v) glassy state (b).                                                                                                                                                    | 6  |
| Table S1   | Predicted transition energies and the changes in the electron densities of the lowest 10 vertical transitions of compound <b>1</b> .                                                                                                                      | 7  |
| Table S2   | Predicted transition energies and the changes in the electron densities of the lowest 10 vertical transitions of compound <b>3</b> .                                                                                                                      | 8  |
| Table S3   | Predicted transition energies and the changes in the electron densities of the lowest 10 vertical transitions of compound <b>4</b> .                                                                                                                      | 9  |
| Table S4   | Predicted transition energies and the changes in the electron densities of the lowest 10 vertical transitions of compound <b>5</b> .                                                                                                                      | 10 |
| Table S5   | Predicted transition energies and the changes in the electron densities of the lowest 10 vertical transitions of compound <b>6</b> .                                                                                                                      | 11 |
| Figure S8. | Overlaid experimental (black) and predicted (red) electronic absorption spectra of <b>3</b> - <b>6</b> in dichloromethane. The predicted vertical transitions were shown as red vertical bars with height equal to their calculated oscillator strengths. | 12 |

## Experimental section

**Physical Measurements and Instrumentation.**  $^1\text{H}$  NMR and  $^{31}\text{P}\{^1\text{H}\}$  NMR spectra were recorded on a Bruker AV300 (300 MHz) FT-NMR spectrometer. Chemical shifts ( $\delta$ , ppm) are reported relative to tetramethylsilane ( $\text{Me}_4\text{Si}$ ). Elemental analysis was performed on an ElementarVario MICRO Cube elemental analyzer. IR spectra of the solid samples as KBr discs were obtained within the range 4000–400  $\text{cm}^{-1}$  on an AVATAR 360 FTIR spectrometer. All of the electronic absorption spectra were recorded on a Hewlett–Packard 8453 or Hewlett–Packard 8452A diode-array spectrophotometer. Steady-state emission spectra were measured at room temperature and at 77 K on a Horiba JobinYvon Fluorolog-3-TCSPC spectrofluorometer. The solutions were rigorously degassed on a high-vacuum line in a two-compartment cell with not less than four successive freeze–pump–thaw cycles. The measurements at 77 K were carried out on dilute solutions of the samples in EtOH/MeOH (4:1, v/v) loaded in a quartz tube inside a quartz-walled Dewar flask that contained liquid nitrogen. Luminescence lifetimes were measured by using the time-correlated single-photon-counting (TCSPC) technique on a Fluorolog-3-TCSPC spectrofluorometer in a fast MCS mode with a Nano LED-375 LH excitation source, which had a peak excitation wavelength at 375 nm and a pulse width of less than 750 ps. The photon-counting data were analyzed on Horiba JobinYvon Decay Analysis Software.

**X-ray Crystallography.** The crystal structures were determined on an Oxford Diffraction Gemini S Ultra X-ray single-crystal diffractometer using graphite-monochromated  $\text{Cu } K_\alpha$  radiation ( $\lambda = 1.5417 \text{ \AA}$ ). The structures were solved by using direct methods with the SHELXS-97 program.<sup>1</sup> The Cu, Ag metal atoms and many of the non-hydrogen atoms were located according to the direct methods. The positions of the other non-hydrogen atoms were located after refinement by full matrix least-squares by using the SHELXL-97 program.<sup>2</sup> In the final stage of the least-squares refinement, all non-hydrogen atoms were refined anisotropically. H atoms were generated by SHELXL-97 program. The positions of H atoms were calculated based on riding model with thermal parameters that were 1.2 times that of the associated C atoms and participated in the calculation of the final R indices. Crystallographic data (including structure factors) of the structures reported in this paper have been deposited to the Cambridge Crystallographic Data Centre (CCDC) with the depository numbers CCDC 1577074–1577079.

**Computational Details.** All the calculations were done by GAUSSIAN 09, version B.01.<sup>3</sup> The ground state and lowest triplet state structures of complexes **1** - **6** were optimized using B3LYP functional<sup>4</sup> and a mixed basis set of 6-31+G(d) (for C, H, N, P) and LANL2DZ<sup>5</sup> (for Cu and Ag). To reduce computation complexity, the phenyl rings of the triphenylphosphine ligands are replaced by methyl groups. Polarized Continuum Model<sup>6</sup> (PCM) was employed to account for the solvent effect of dichloromethane. Frequency calculations were done after optimization and no imaginary frequencies were found. The vertical electronic transitions of **1**, **3** - **6** were calculated by time-dependent density functional theory.<sup>7</sup> The X-ray crystal structures of the complexes were used without further optimization.

### Reference:

- (1) G. M. Sheldrick, SHELX-97: Programs for Crystal Structure Analysis, release 97-2, University of Gottingen, Germany, 1997.
- (2) A. Altomare, G. Cascarano, C. Giacovazzo, A. Guagliardi, M. Burla, G. Polidori and M. Camalli, *J. Appl. Crystallogr.*, 1994, **27**, 435.
- (3) M. J. Frisch, G. W. Trucks, H. B. Schlegel *et al.*, *Gaussian 09*, Revision B.01, Gaussian, Inc., Wallingford CT, 2009
- (4) (a) A. D. Becke, *J. Chem. Phys.* 1993, **98**, 5648–5652; (b) C. Lee, W. Yang, R. G. Parr, *Phys. Rev. B*, 1988, **37**, 785; (c) P. J. Stephens, F. J. Devlin, C. F. Chabalowski, M. J. Frisch, *J. Phys. Chem.* 1994, **98**, 11623–11627.
- (5) (a) Y. Zhao and D. G. Truhlar, *Theor. Chem. Acc.*, 2008, **120**, 215–241; (b) A. Schäfer, H. Horn and R. Ahlrichs, *J. Chem. Phys.* 1992, **97**, 2571–2577; (c) W. R. Wadt and P. J. Hay, *J. Chem. Phys.* 1985, **82**, 284–298.
- (6) G. Scalmani and M. J. Frisch, *J. Chem. Phys.* 2010, **132**, 114110.
- (7) (a) R. Bauernschmitt, R. Ahlrichs, *Chem. Phys. Lett.*, 1996, **256**, 454–64; (b) G. Scalmani, M. J. Frisch, B. Mennucci, J. Tomasi, R. Cammi, V. Barone, *J. Chem. Phys.*, 2006, **124**, 094107.

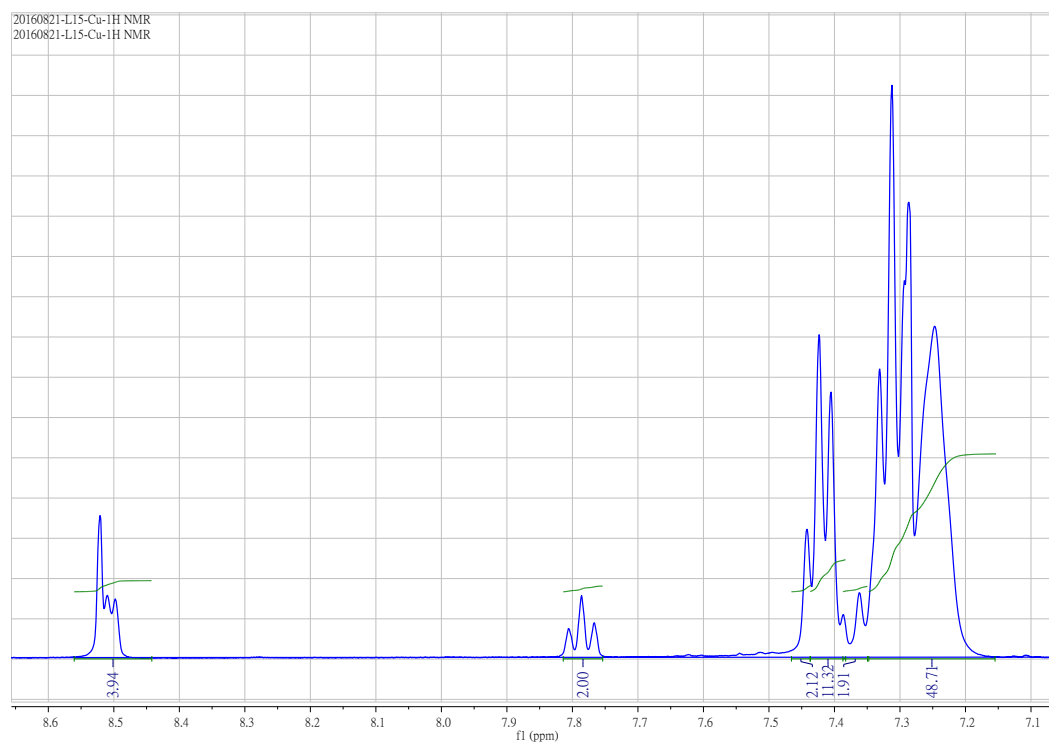

**Figure S1.**  $^1\text{H}$  NMR spectroscopy of **1**

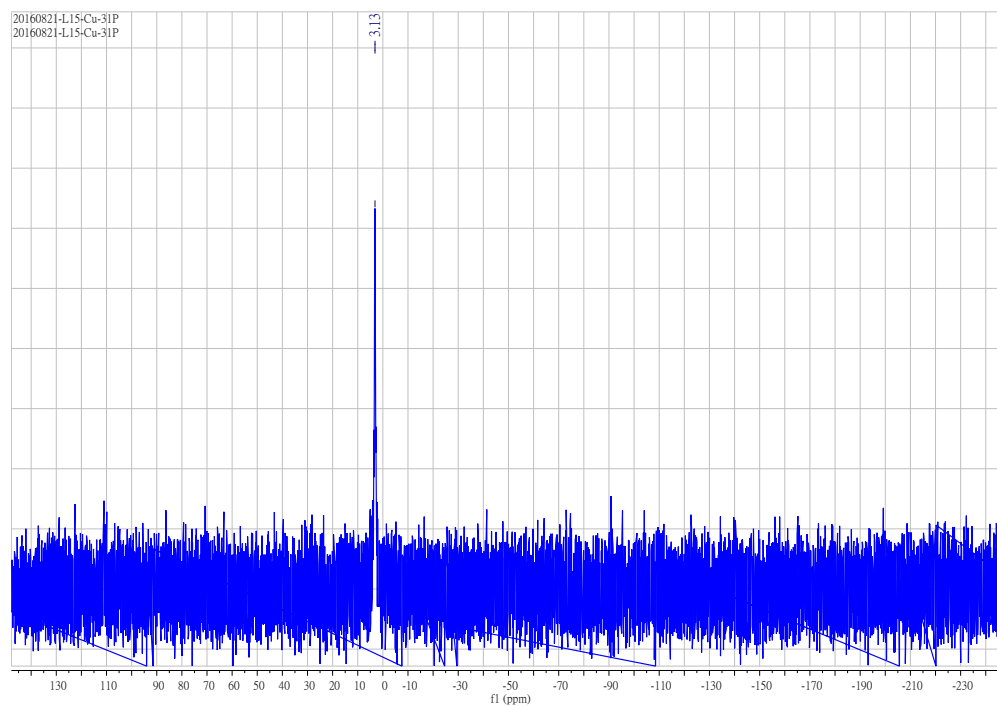

**Figure S2.**  $^{31}\text{P}\{^1\text{H}\}$  NMR spectroscopy of **1**.

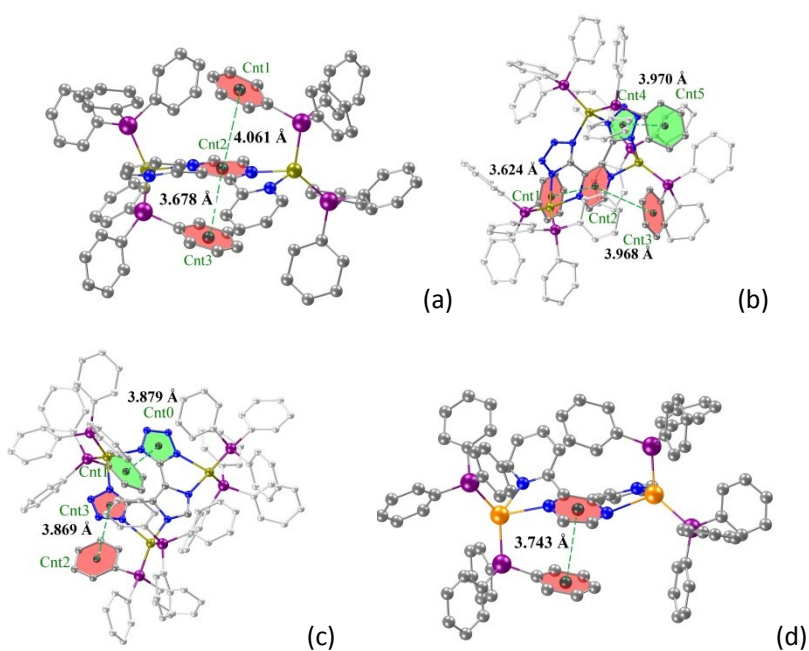

**Figure S3.** The  $\pi \cdots \pi$  stacking interactions in **1** (a), **2**(b), **3**(c) and **4** (d).

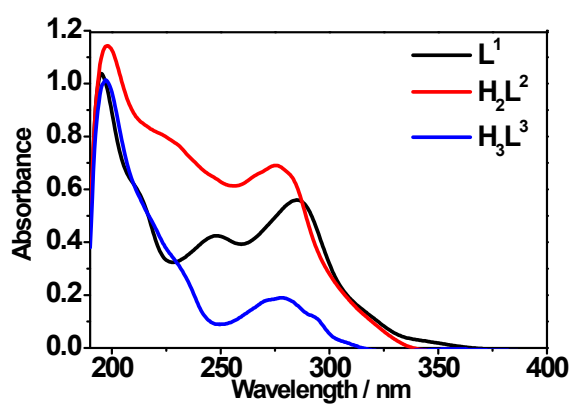

**Figure S4.** UV spectra of ligands **L**<sup>1</sup>, **H**<sub>2</sub>**L**<sup>2</sup> and **H**<sub>3</sub>**L**<sup>3</sup> in MeCN.

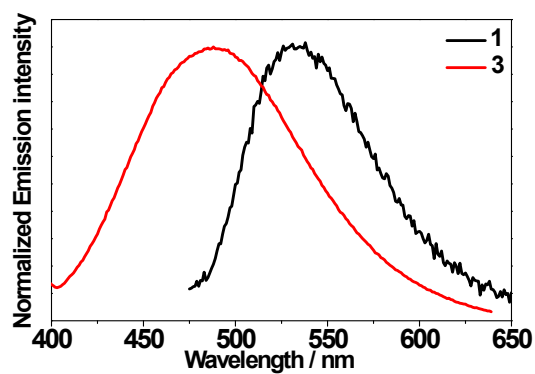

**Figure S5.** The emission spectra of compounds **1** and **3** in CH<sub>2</sub>Cl<sub>2</sub> ( $\lambda_{\text{ex}} = 400$  nm).

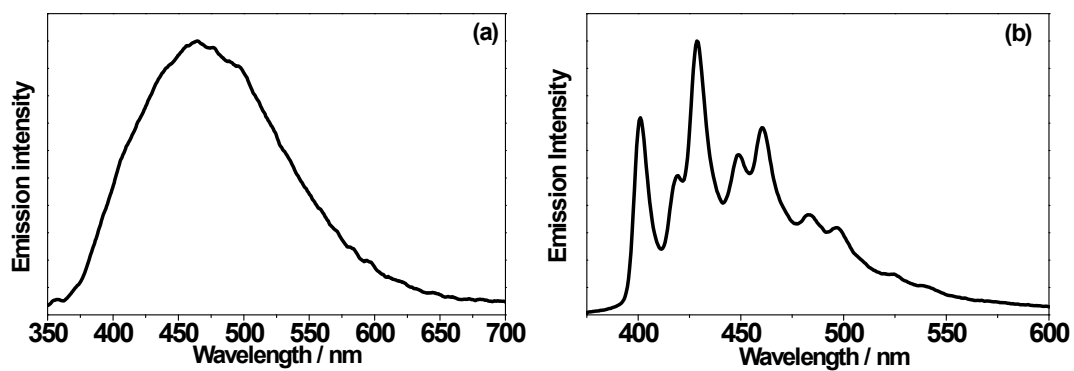

**Figure S6.** Emission spectra of **3** (a) in solid state and (b) in 77 K EtOH – MeOH (4:1, v/v) glassy state.

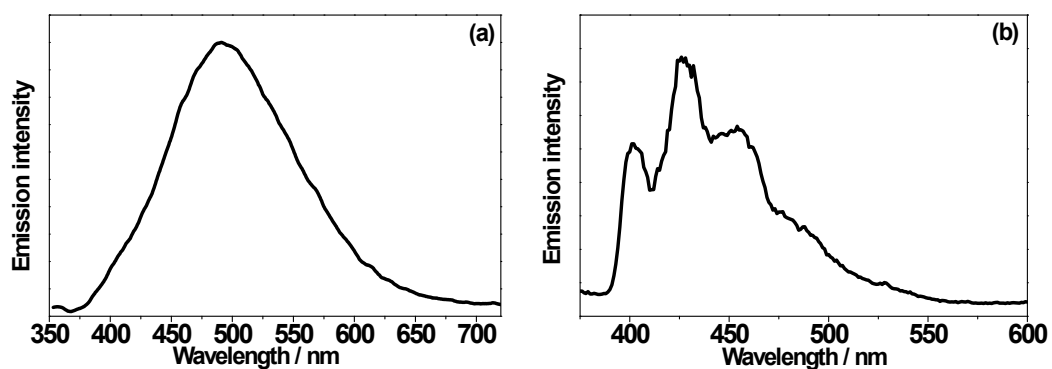

**Figure S7.** Emission spectra of **6** (a) in solid state and (b) in 77 K EtOH – MeOH (4:1, v/v) glassy state.

**Table S1 – S5.** Calculated transition energies and the changes in the electron densities of the lowest 10 vertical transitions of **1** and **3 – 6**.

**Table S1.** For compound **1**

| $\lambda_{\text{calc}} / \text{nm}$<br>(Oscillator Strength) | Changes of the electron density (%)<br>contribution; H:HOMO, L:LUMO) | Transition Characters      |
|--------------------------------------------------------------|----------------------------------------------------------------------|----------------------------|
| 480.25<br>(0.2049)                                           | <b>H→L (96.4%)</b>                                                   | MLCT[d(Cu)→ $\pi^*(L^1)$ ] |
| 455.49<br>(0.0135)                                           | H-2→L (4.9%), <b>H-1→L (85.1%)</b> , H→L+1 (4.7%)                    | MLCT[d(Cu)→ $\pi^*(L^1)$ ] |
| 439.50<br>(0.0067)                                           | H-1→L (3.6%), <b>H→L+1 (93.2%)</b>                                   | MLCT[d(Cu)→ $\pi^*(L^1)$ ] |
| 429.77<br>(0.0189)                                           | H-4→L (2.8%), <b>H-2→L (82.9%)</b> , H-1→L (5.5%)                    | MLCT[d(Cu)→ $\pi^*(L^1)$ ] |
| 424.68<br>(0.0019)                                           | <b>H-1→L+1 (94.9%)</b>                                               | MLCT[d(Cu)→ $\pi^*(L^1)$ ] |
| 415.97<br>(0.0054)                                           | <b>H-3→L (87.5%)</b> , H-3→L+1 (2.8%)                                | MLCT[d(Cu)→ $\pi^*(L^1)$ ] |
| 411.70<br>(0.0256)                                           | <b>H-4→L (85.5%)</b> , H-2→L (2.4%)                                  | MLCT[d(Cu)→ $\pi^*(L^1)$ ] |
| 399.28<br>(0.0023)                                           | H-9→L (5.2%), H-7→L (21.4%), <b>H-5→L (56.2%)</b> , H-4→L+1 (5.6%)   | MLCT[d(Cu)→ $\pi^*(L^1)$ ] |
| 386.48<br>(0.0014)                                           | H-2→L (2.4%), <b>H-2→L+1 (92.0%)</b>                                 | MLCT[d(Cu)→ $\pi^*(L^1)$ ] |
| 374.82<br>(0.0001)                                           | H-5→L+1 (2.7%), H-3→L (3.4%), <b>H-3→L+1 (89.0%)</b>                 | MLCT[d(Cu)→ $\pi^*(L^1)$ ] |

**Table S2.** For compound **3**

| $\lambda_{\text{calc}}$ / nm<br>(Oscillator Strength) | Changes of the electron density (% contribution; H:HOMO,L:LUMO)                                                                                                                                                                                                                                                                                                                                                                     | Transition Characters                                                                                      |
|-------------------------------------------------------|-------------------------------------------------------------------------------------------------------------------------------------------------------------------------------------------------------------------------------------------------------------------------------------------------------------------------------------------------------------------------------------------------------------------------------------|------------------------------------------------------------------------------------------------------------|
| 344.2 nm<br>(0.0037)                                  | H-1 $\rightarrow$ L+1 (7.9%), H $\rightarrow$ L (2.2%), <b>H<math>\rightarrow</math>L+1 (83.0%)</b>                                                                                                                                                                                                                                                                                                                                 | LLCT[ $\pi(\text{L}^3) \rightarrow \pi^*(\text{PPh}_3)$ ] + MLCT[d(Cu) $\rightarrow \pi^*(\text{PPh}_3)$ ] |
| 343.0 nm<br>(0.0070)                                  | H-2 $\rightarrow$ L (2.1%), H-1 $\rightarrow$ L (31.5%), <b>H<math>\rightarrow</math>L (61.2%)</b> , H $\rightarrow$ L+1 (2.5%)                                                                                                                                                                                                                                                                                                     | LLCT[ $\pi(\text{L}^3) \rightarrow \pi^*(\text{PPh}_3)$ ] + MLCT[d(Cu) $\rightarrow \pi^*(\text{PPh}_3)$ ] |
| 331.9 nm<br>(0.0055)                                  | H-2 $\rightarrow$ L+1 (14.3%), <b>H-1<math>\rightarrow</math>L+1 (38.0%)</b> , H-1 $\rightarrow$ L+2 (2.1%), <b>H<math>\rightarrow</math>L (26.3%)</b> , H $\rightarrow$ L+2 (3.0%), H $\rightarrow$ L+3 (6.0%)                                                                                                                                                                                                                     | MLCT[d(Cu) $\rightarrow \pi^*(\text{PPh}_3)$ ] + LLCT[ $\pi(\text{L}^3) \rightarrow \pi^*(\text{PPh}_3)$ ] |
| 330.5 nm<br>(0.0045)                                  | H-2 $\rightarrow$ L (2.3%), H-1 $\rightarrow$ L (2.7%), H-1 $\rightarrow$ L+3 (3.1%), H $\rightarrow$ L (2.9%), H $\rightarrow$ L+2 (5.9%), <b>H<math>\rightarrow</math>L+3 (29.8%)</b> , <b>H<math>\rightarrow</math>L+4 (25.2%)</b> , H $\rightarrow$ L+6 (16.0%)                                                                                                                                                                 | LLCT[ $\pi(\text{L}^3) \rightarrow \pi^*(\text{PPh}_3)$ ] + MLCT[d(Cu) $\rightarrow \pi^*(\text{PPh}_3)$ ] |
| 324.1 nm<br>(0.0227)                                  | H-2 $\rightarrow$ L+2 (7.3%), H-1 $\rightarrow$ L (7.5%), H-1 $\rightarrow$ L+2 (6.7%), H-1 $\rightarrow$ L+4 (3.1%), H $\rightarrow$ L (4.4%), <b>H<math>\rightarrow</math>L+2 (57.5%)</b> , H $\rightarrow$ L+3 (2.8%)                                                                                                                                                                                                            | LLCT[ $\pi(\text{L}^3) \rightarrow \pi^*(\text{PPh}_3)$ ] + MLCT[d(Cu) $\rightarrow \pi^*(\text{PPh}_3)$ ] |
| 321.6 nm<br>(0.0087)                                  | H-2 $\rightarrow$ L (2.3%), H-1 $\rightarrow$ L (2.7%), H-1 $\rightarrow$ L+3 (3.1%), H $\rightarrow$ L (2.9%), H $\rightarrow$ L+2 (5.9%), <b>H<math>\rightarrow</math>L+3 (29.8%)</b> , <b>H<math>\rightarrow</math>L+4 (25.2%)</b> , H $\rightarrow$ L+6 (16.0%)                                                                                                                                                                 | LLCT[ $\pi(\text{L}^3) \rightarrow \pi^*(\text{PPh}_3)$ ] + MLCT[d(Cu) $\rightarrow \pi^*(\text{PPh}_3)$ ] |
| 321.2 nm<br>(0.0041)                                  | H-1 $\rightarrow$ L+8 (5.6%), H $\rightarrow$ L+5 (8.9%), H $\rightarrow$ L+6 (10.6%), <b>H<math>\rightarrow</math>L+7 (49.3%)</b> , H $\rightarrow$ L+8 (12.1%)                                                                                                                                                                                                                                                                    | LLCT[ $\pi(\text{L}^3) \rightarrow \pi^*(\text{PPh}_3)$ ] + MLCT[d(Cu) $\rightarrow \pi^*(\text{PPh}_3)$ ] |
| 319.5 nm<br>(0.0149)                                  | H-1 $\rightarrow$ L+1 (4.5%), H-1 $\rightarrow$ L+3 (2.3%), H-1 $\rightarrow$ L+5 (15.8%), H $\rightarrow$ L+3 (13.7%), <b>H<math>\rightarrow</math>L+5 (40.4%)</b> , H $\rightarrow$ L+6 (3.6%), H $\rightarrow$ L+8 (5.0%), H $\rightarrow$ L+15 (2.3%)                                                                                                                                                                           | LLCT[ $\pi(\text{L}^3) \rightarrow \pi^*(\text{PPh}_3)$ ] + MLCT[d(Cu) $\rightarrow \pi^*(\text{PPh}_3)$ ] |
| 317.1 nm<br>(0.0022)                                  | <b>H-2<math>\rightarrow</math>L (34.9%)</b> , H-2 $\rightarrow$ L+2 (8.9%), H-2 $\rightarrow$ L+4 (2.1%), H-1 $\rightarrow$ L (6.6%), H-1 $\rightarrow$ L+5 (3.4%), H $\rightarrow$ L+2 (15.5%), H $\rightarrow$ L+3 (2.6%), H $\rightarrow$ L+6 (2.3%), H $\rightarrow$ L+7 (2.2%)                                                                                                                                                 | MLCT[d(Cu) $\rightarrow \pi^*(\text{PPh}_3)$ ] + LLCT[ $\pi(\text{L}^3) \rightarrow \pi^*(\text{PPh}_3)$ ] |
| 315.9 nm<br>(0.0279)                                  | <b>H-2<math>\rightarrow</math>L (34.9%)</b> , H-2 $\rightarrow$ L+2 (8.9%), H-2 $\rightarrow$ L+3 (2.1%), H-2 $\rightarrow$ L+6 (6.6%), H-1 $\rightarrow$ L+1 (3.4%), H $\rightarrow$ L+2 (15.5%), H $\rightarrow$ L+3 (2.6%), H $\rightarrow$ L+4 (2.3%), H $\rightarrow$ L+6 (2.2%), H $\rightarrow$ L+7 (2.2%), H $\rightarrow$ L+8 (2.2%), H $\rightarrow$ L+9 (2.2%), H $\rightarrow$ L+12 (2.2%), H $\rightarrow$ L+15 (2.2%) | MLCT[d(Cu) $\rightarrow \pi^*(\text{PPh}_3)$ ] + LLCT[ $\pi(\text{L}^3) \rightarrow \pi^*(\text{PPh}_3)$ ] |

**Table S3.** For compound **4**

| $\lambda_{\text{calc}}$ / nm<br>(Oscillator Strength) | Changes of the electron density (% contribution; H:HOMO,L:LUMO)                                    | Transition Characters                      |
|-------------------------------------------------------|----------------------------------------------------------------------------------------------------|--------------------------------------------|
| 424.37 nm<br>(0.0282)                                 | <b>H→L (98.9%)</b>                                                                                 | MLCT[d(Ag)→ $\pi^*(L^1)$ ]                 |
| 396.19 nm<br>(0.0106)                                 | <b>H-1→L (84.3%)</b> , H-1→L+1 (7.4%), H→L+1 (6.0%)                                                | MLCT[d(Ag)→ $\pi^*(L^1)$ ]                 |
| 393.41 nm<br>(0.0015)                                 | H-1→L (6.1%), <b>H→L+1 (92.1%)</b>                                                                 | MLCT[d(Ag)→ $\pi^*(L^1)$ ]                 |
| 388.13 nm<br>(0.0339)                                 | H-3→L (3.4%), <b>H-2→L (89.3%)</b>                                                                 | MLCT[d(Ag)→ $\pi^*(L^1)$ ]                 |
| 380.35 nm<br>(0.0056)                                 | H-3→L (11.6%), H-2→L (3.0%), H-2→L+1 (2.3%), H-1→L (5.4%), <b>H-1→L+1 (75.3%)</b>                  | MLCT[d(Ag)→ $\pi^*(L^1)$ ]                 |
| 376.20 nm<br>(0.0061)                                 | <b>H-3→L (70.3%)</b> , H-3→L+1 (3.4%), H-2→L (2.7%), H-2→L+1 (4.7%), H-1→L+1 (15.3%)               | MLCT[d(Ag)→ $\pi^*(L^1)$ ]                 |
| 365.57 nm<br>(0.0011)                                 | H-3→L (12.7%), H-3→L+1 (32.9%), <b>H-2→L+1 (51.4%)</b>                                             | MLCT[d(Ag)→ $\pi^*(L^1)$ ]                 |
| 353.92 nm<br>(0.0005)                                 | <b>H-3→L+1 (58.5%)</b> , H-2→L+1 (38.1%)                                                           | MLCT[d(Ag)→ $\pi^*(L^1)$ ]                 |
| 339.72 nm<br>(0.0173)                                 | H-9→L (3.4%), H-8→L (4.5%), <b>H-4→L (83.5%)</b>                                                   | LLCT[ $\pi(\text{PPh}_3)$ → $\pi^*(L^1)$ ] |
| 326.13 nm<br>(0.0158)                                 | <b>H-21→L (70.3%)</b> , H-20→L (3.4%), H-19→L (2.7%), H-18→L (4.7%), H-13→L (15.3%), H-6→L (15.3%) | LLCT[ $\pi(\text{PPh}_3)$ → $\pi^*(L^1)$ ] |

**Table S4.** For compound **5**

| $\lambda_{\text{calc}}$ / nm<br>(Oscillator Strength) | Changes of the electron density (% contribution; H:HOMO,L:LUMO)                                                                                                                                                                                                                        | Transition Characters                                                                         |
|-------------------------------------------------------|----------------------------------------------------------------------------------------------------------------------------------------------------------------------------------------------------------------------------------------------------------------------------------------|-----------------------------------------------------------------------------------------------|
| 355.0 nm<br>(0.0212)                                  | H-1 $\rightarrow$ L (5.8%), <b>H<math>\rightarrow</math>L (93.5%)</b>                                                                                                                                                                                                                  | MLCT[d(Ag) $\rightarrow$ $\pi^*(L^2)$ ]                                                       |
| 348.2 nm<br>(0.0056)                                  | H-10 $\rightarrow$ L (2.4%), H-9 $\rightarrow$ L (2.3%), H-2 $\rightarrow$ L (4.2%), <b>H-1<math>\rightarrow</math>L (80.7%)</b> , H $\rightarrow$ L (5.7%)                                                                                                                            | MLCT[d(Ag) $\rightarrow$ $\pi^*(L^2)$ ]                                                       |
| 330.7 nm<br>(0.0019)                                  | <b>H-2<math>\rightarrow</math>L (87.2%)</b> , H-1 $\rightarrow$ L (7.3%)                                                                                                                                                                                                               | MLCT[d(Ag) $\rightarrow$ $\pi^*(L^2)$ ] +<br>LLCT[ $\pi(\text{PPh}_3)\rightarrow\pi^*(L^2)$ ] |
| 312.5 nm<br>(0.0050)                                  | H-29 $\rightarrow$ L(2.0%), H-13 $\rightarrow$ L (4.8%), H-11 $\rightarrow$ L (9.7%), <b>H-10<math>\rightarrow</math>L (21.9%)</b> , <b>H-9<math>\rightarrow</math>L (24.4%)</b> , <b>H-3<math>\rightarrow</math>L(16.4%)</b> , H-2 $\rightarrow$ L (7.5%), H-1 $\rightarrow$ L (4.4%) | MLCT[d(Ag) $\rightarrow$ $\pi^*(L^2)$ ] +<br>LLCT[ $\pi(\text{PPh}_3)\rightarrow\pi^*(L^2)$ ] |
| 304.5 nm<br>(0.0007)                                  | H-11 $\rightarrow$ L (2.2%), H-10 $\rightarrow$ L (6.2%), H-9 $\rightarrow$ L (5.1%), <b>H-3<math>\rightarrow</math>L (81.5%)</b>                                                                                                                                                      | MLCT[d(Ag) $\rightarrow$ $\pi^*(L^2)$ ] +<br>LLCT[ $\pi(\text{PPh}_3)\rightarrow\pi^*(L^2)$ ] |
| 297.1 nm<br>(0.0049)                                  | H-4 $\rightarrow$ L (2.8%), H-1 $\rightarrow$ L+1 (5.9%), <b>H<math>\rightarrow</math>L+1 (88.7%)</b>                                                                                                                                                                                  | MLCT[d(Ag) $\rightarrow$ $\pi^*(L^2)$ ]                                                       |
| 291.7 nm<br>(0.0522)                                  | H-6 $\rightarrow$ L (2.1%), H-5 $\rightarrow$ L (3.4%), <b>H-4<math>\rightarrow</math>L (47.4%)</b> , H-1 $\rightarrow$ L+1 (27.2%), H $\rightarrow$ L+1 (9.5%)                                                                                                                        | IL[ $L^2$ ] +<br>LLCT[ $\pi(\text{PPh}_3)\rightarrow\pi^*(L^2)$ ]                             |
| 291.3 nm<br>(0.0148)                                  | H-5 $\rightarrow$ L (2.5%), H-4 $\rightarrow$ L (33.2%), H-2 $\rightarrow$ L+1 (2.3%), <b>H-1<math>\rightarrow</math>L+1 (52.8%)</b>                                                                                                                                                   | MLCT[d(Ag) $\rightarrow$ $\pi^*(L^2)$ ]                                                       |
| 285.0 nm<br>(0.0032)                                  | H-13 $\rightarrow$ L (2.3%), H-6 $\rightarrow$ L (3.4%), <b>H-5<math>\rightarrow</math>L (79.1%)</b> , H-4 $\rightarrow$ L (8.4%)                                                                                                                                                      | LLCT[ $\pi(\text{PPh}_3)\rightarrow\pi^*(L^2)$ ]                                              |
| 283.3 nm<br>(0.0071)                                  | H-7 $\rightarrow$ L (9.0%), <b>H-6<math>\rightarrow</math>L (73.5%)</b> , H-5 $\rightarrow$ L (4.2%), H-4 $\rightarrow$ L (2.2%), H-2 $\rightarrow$ L+1 (4.8%)                                                                                                                         | LLCT[ $\pi(\text{PPh}_3)\rightarrow\pi^*(L^2)$ ] +<br>IL[ $L^2$ ]                             |

**Table S5.** For compound **6**

| $\lambda_{\text{calc}}$ / nm<br>(Oscillator Strength) | Changes of the electron density (% contribution; H:HOMO,L:LUMO)  | Transition Characters                                     |
|-------------------------------------------------------|------------------------------------------------------------------|-----------------------------------------------------------|
| 326.98 nm<br>(0.0021)                                 | <b>H→L (88.4%)</b> , H→L+1 (8.1%)                                | LLCT[ $\pi(\text{L}^3) \rightarrow \pi^*(\text{PPh}_3)$ ] |
| 324.26 nm<br>(0.0009)                                 | H→L (6.0%), <b>H→L+1 (80.5%)</b> , H→L+2 (8.9%)                  | LLCT[ $\pi(\text{L}^3) \rightarrow \pi^*(\text{PPh}_3)$ ] |
| 321.36 nm<br>(0.0006)                                 | H→L (3.1%), H→L+1 (7.1%), <b>H→L+2 (81.0%)</b> ,<br>H→L+3 (3.7%) | LLCT[ $\pi(\text{L}^3) \rightarrow \pi^*(\text{PPh}_3)$ ] |
| 317.33 nm<br>(0.0068)                                 | H→L+3 (3.8%), H→L+4 (20.3%), <b>H→L+5 (68.8%)</b> , H→L+6 (3.4%) | LLCT[ $\pi(\text{L}^3) \rightarrow \pi^*(\text{PPh}_3)$ ] |
| 316.22 nm<br>(0.0094)                                 | <b>H→L+4 (73.8%)</b> , H→L+5 (20.0%)                             | LLCT[ $\pi(\text{L}^3) \rightarrow \pi^*(\text{PPh}_3)$ ] |
| 314.97 nm<br>(0.0029)                                 | H→L+2 (4.8%), <b>H→L+3 (89.8%)</b> , H→L+5 (3.3%)                | LLCT[ $\pi(\text{L}^3) \rightarrow \pi^*(\text{PPh}_3)$ ] |
| 313.37 nm<br>(0.0249)                                 | H→L+4 (2.4%), <b>H→L+5 (2.4%)</b> , H→L+6 (88.6%)                | LLCT[ $\pi(\text{L}^3) \rightarrow \pi^*(\text{PPh}_3)$ ] |
| 309.16 nm<br>(0.0077)                                 | <b>H→L+7 (91.2%)</b> , H→L+9 (3.2%)                              | LLCT[ $\pi(\text{L}^3) \rightarrow \pi^*(\text{PPh}_3)$ ] |
| 305.76 nm<br>(0.0267)                                 | H→L+7 (3.1%), H→L+8 (3.3%), <b>H→L+9 (87.6%)</b>                 | LLCT[ $\pi(\text{L}^3) \rightarrow \pi^*(\text{PPh}_3)$ ] |
| 303.52 nm<br>(0.0029)                                 | <b>H→L+8 (95.7%)</b> , H→L+9 (3.3%)                              | LLCT[ $\pi(\text{L}^3) \rightarrow \pi^*(\text{PPh}_3)$ ] |

**Figure S8.** Overlaid experimental (black) and predicted (red) electronic absorption spectra of **3** - **6** in dichloromethane. The predicted vertical transitions were shown as red vertical bars with height equal to their calculated oscillator strengths.

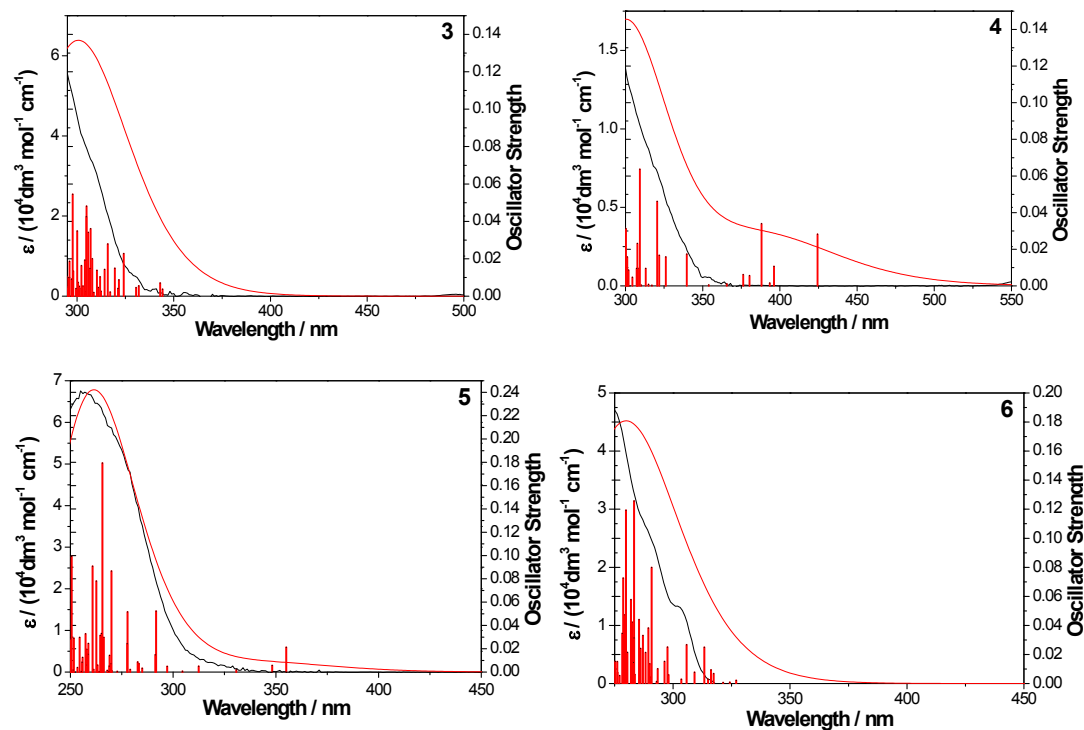

Supplement: c8dt03377c1.pdf [file c8dt03377c1.pdf]
